# Supplementary material
Source: HighWire-hosted journal article supplement (https://ajnr-sso.highwirestaging.com/highwire/filestream/100533/field_highwire_adjunct_files/0/0706.pdf)
Supplement: 0706.pdf [file 0706.pdf]

Table S1. Clinical and neuroimaging characteristics stratified by 90-day functional Outcome

| Variables                     | All patients<br>(n = 295) | Favorable<br>outcome (n=156) | Unfavorable<br>outcome (n=139) | <i>P</i> value    |
|-------------------------------|---------------------------|------------------------------|--------------------------------|-------------------|
| Age (years)*                  | 71.0 (63.0, 78.0)         | 69.0 (61.0, 75.0)            | 73.0 (67.0, 79.0)              | <b>&lt; 0.001</b> |
| Male, n (%)                   | 171 (58.0%)               | 99 (63.5%)                   | 72 (51.8%)                     | <b>0.043</b>      |
| LSW to admission time, min*   | 270 (143, 432)            | 253 (121, 447)               | 297 (180, 428)                 | 0.147             |
| ≤ 6 h, n (%)                  | 186 (63.1%)               | 104 (66.7%)                  | 82 (59.0%)                     |                   |
| > 6 h, n (%)                  | 109 (36.9%)               | 52 (33.3%)                   | 57 (41.0%)                     |                   |
| Large artery occlusion, n (%) |                           |                              |                                | 0.737             |
| MCA-M1                        | 196 (66.4%)               | 100 (64.1%)                  | 96 (69.1%)                     |                   |
| MCA-M2                        | 54 (18.3%)                | 32 (20.5%)                   | 22 (15.8%)                     |                   |
| ICA                           | 16 (5.4%)                 | 8 (5.1%)                     | 8 (5.8%)                       |                   |
| ICA+MCA-M1                    | 29 (9.8%)                 | 16 (10.3%)                   | 13 (9.4%)                      |                   |
| NIHSS <sub>admission</sub> *  | 10 (6, 16)                | 11 (6, 16)                   | 16 (12, 21)                    | <b>&lt; 0.001</b> |
| ASPECTS*                      | 7 (6, 9)                  | 8 (7, 9)                     | 6 (4, 8)                       | <b>&lt; 0.001</b> |
| ASPECTS-NWU (%)*              | 6.83 (5.04, 8.76)         | 5.73 (3.18, 7.50)            | 8.00 (6.52, 10.03)             | <b>&lt; 0.001</b> |
| Treatment, n (%)              |                           |                              |                                | 0.325             |
| Intravenous thrombolysis      | 32 (10.8%)                | 15 (9.6%)                    | 17 (12.2%)                     |                   |
| Mechanical thrombectomy       | 140 (47.5%)               | 71 (45.5%)                   | 69 (49.6%)                     |                   |
| Bridging therapy              | 76 (25.8%)                | 47 (30.1%)                   | 29 (20.9%)                     |                   |
| Standard medical therapy      | 47 (15.9%)                | 23 (14.7%)                   | 24 (17.3%)                     |                   |
| Vessel recanalization, n (%)  | 184 (62.4%)               | 118 (75.6%)                  | 66 (47.5%)                     | <b>&lt; 0.001</b> |

Note: \*Data are expressed as median, IQR (interquartile range presented as the 25th and 75th percentile).

Abbreviations: NIHSS<sub>admission</sub>, National Institutes of Health Stroke Scale scores at admission; LSW, last seen well; MCA, middle cerebral artery; ICA, internal carotid artery; ASPECTS, Alberta Stroke Program Early CT Score; NWU, net water uptake.

Table S2. Clinical and neuroimaging predictors for a 90-day favorable outcome in a subgroup of patients with low ASPECTS ( $\leq 5$ )

| Variables                               | Favorable outcome<br>(n=18) | Unfavorable outcome<br>(n=50) | <i>P</i> value    | OR (95% CI)*         |
|-----------------------------------------|-----------------------------|-------------------------------|-------------------|----------------------|
| Age (years) <sup>a</sup>                | 64.3 $\pm$ 13.6             | 70.5 $\pm$ 11.7               | 0.072             |                      |
| Male, n (%)                             | 16 (88.9%)                  | 30 (60.0%)                    | <b>0.025</b>      | 17.90 (2.17, 147.51) |
| NIHSS <sub>admission</sub> <sup>b</sup> | 19 (13, 21)                 | 16 (14, 23)                   | 0.621             |                      |
| LSW to admission time, min <sup>b</sup> | 276 (186, 574)              | 289 (194, 430)                | 0.147             |                      |
| Large artery occlusion, n (%)           |                             |                               | 0.896             |                      |
| MCA-M1                                  | 13 (72.2%)                  | 30 (60.0%)                    |                   |                      |
| MCA-M2                                  | 2 (11.1%)                   | 10 (20.0%)                    |                   |                      |
| ICA                                     | 1 (5.6%)                    | 3 (6.0%)                      |                   |                      |
| ICA+MCA-M1                              | 2 (11.1%)                   | 7 (14.0%)                     |                   |                      |
| ASPECTS <sup>b</sup>                    | 4 (4, 5)                    | 4 (3, 5)                      | 0.154             |                      |
| ASPECTS-NWU (%) <sup>a</sup>            | 8.44 $\pm$ 1.44             | 10.15 $\pm$ 3.12              | <b>0.003</b>      | 0.56 (0.34, 0.92)    |
| Treatment, n (%)                        |                             |                               | <b>0.050</b>      |                      |
| Intravenous thrombolysis                | 0 (0.0%)                    | 7 (14.0%)                     |                   |                      |
| Mechanical thrombectomy                 | 11 (61.1%)                  | 22 (44.0%)                    |                   |                      |
| Bridging therapy                        | 7 (38.9%)                   | 12 (24.0%)                    |                   |                      |
| Standard medical therapy                | 0 (0.0%)                    | 9 (18.0%)                     |                   |                      |
| Vessel recanalization, n (%)            | 18 (100.0%)                 | 21 (42.0%)                    | <b>&lt; 0.001</b> |                      |

Note: <sup>a</sup> Data are expressed as mean  $\pm$  standard deviation. <sup>b</sup> Data are expressed as median, IQR (interquartile range presented as the 25th and 75th percentile). \*OR value calculated from multivariable analysis.

Abbreviations: NIHSS<sub>admission</sub>, National Institutes of Health Stroke Scale scores at admission; LSW, last seen well; MCA, middle cerebral artery; ICA, internal carotid artery; ASPECTS, Alberta Stroke Program Early CT Score; NWU, net water uptake; OR, odds ratio; CI, confidence interval.

**Representative cases with good or poor neurological outcomes at 90 days.**

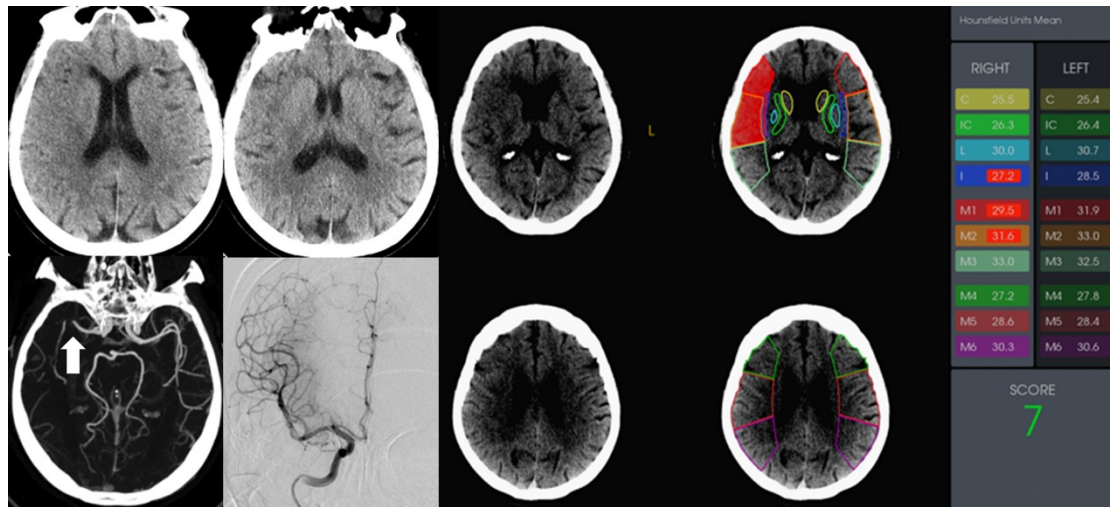

**Figure S1.** A patient with acute ischemic stroke due to occlusion of the M1 segment of the right middle cerebral artery. The NIHSS and ASPECTS at admission are 12 and 7, respectively. The mean value of ASPECTS-NWU at admission CT is 5.5%. Complete revascularization (mTICI grade 3) is achieved after mechanical thrombectomy. This patient has a favorable outcome, with an mRS score of 2 at 90 days.

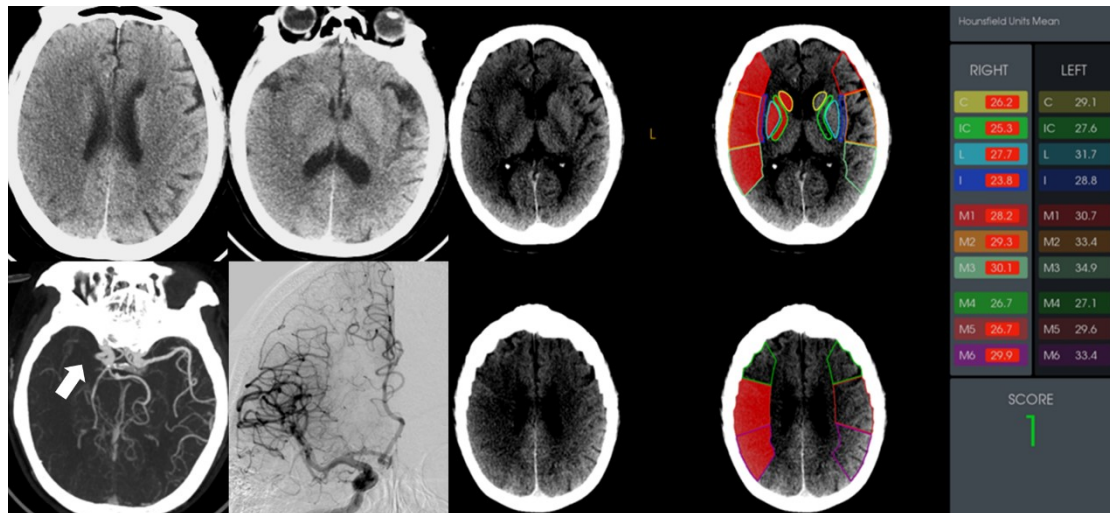

**Figure S2.** A patient with acute ischemic stroke due to occlusion of the M1 segment of the right middle cerebral artery. The NIHSS and ASPECTS at admission are 21 and 1, respectively. The mean value of ASPECTS-NWU at admission CT is 11.5%. This patient has an unfavorable outcome, with an mRS score of 4 at 90 days, despite good recanalization (mTICI grade 2b).
